# Supplementary material for: Small extracellular vesicles secreted by human iPSC-derived MSC enhance angiogenesis through inhibiting STAT3-dependent autophagy in ischemic stroke
Source: PubMed Central journal article supplement (PMC7374834; doi:10.1186/s13287-020-01834-0), 2020-07-22

**Fig. S4**

**A**

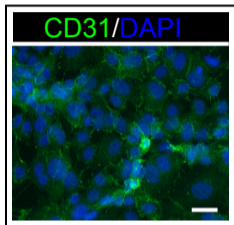

**B**

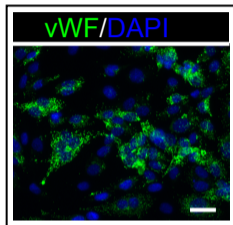

**C**

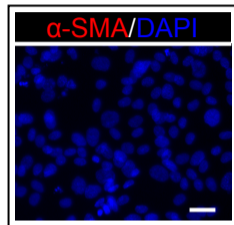

**D**

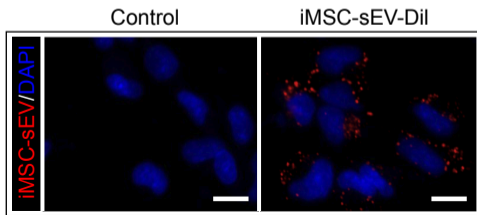

Supplement: 13287_2020_1834_MOESM4_ESM.pdf [file 13287_2020_1834_MOESM4_ESM.pdf]
