# Supplementary material for: Small extracellular vesicles secreted by human iPSC-derived MSC enhance angiogenesis through inhibiting STAT3-dependent autophagy in ischemic stroke
Source: PubMed Central journal article supplement (PMC7374834; doi:10.1186/s13287-020-01834-0), 2020-07-22

# Fig. S5

## A

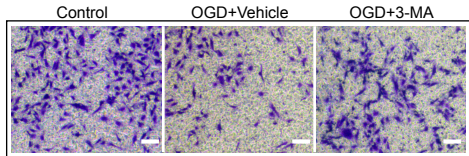

## B

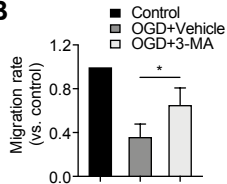

## C

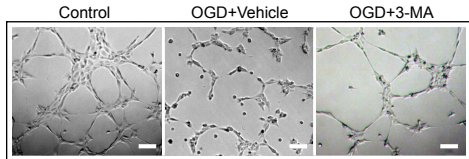

## D

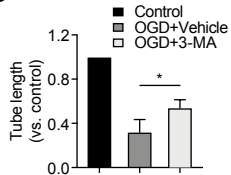

Supplement: 13287_2020_1834_MOESM5_ESM.pdf [file 13287_2020_1834_MOESM5_ESM.pdf]
